# Supplementary material
Source: PubMed Central journal article supplement (PMC7439003)
Supplement: NIHMS1601041-supplement-Supplemental_table_2.pdf [file NIHMS1601041-supplement-Supplemental_table_2.pdf]

Table S2.

**A.** WNT pathway

| Value | Gene  | Description                                                                                           | UniGene   | RefSeq    |
|-------|-------|-------------------------------------------------------------------------------------------------------|-----------|-----------|
| 2.440 | WNT16 | wingless-type MMTV integration site family, member 16 (WNT16), transcript variant 2, mRNA.            | Hs.272375 | NM_016087 |
| 1.947 | PLCB4 | phospholipase C, beta 4 (PLCB4), transcript variant 2, mRNA.                                          | Hs.472101 | NM_182797 |
| 1.934 | PLCB4 | phospholipase C, beta 4 (PLCB4), transcript variant 1, mRNA.                                          | Hs.472101 | NM_000933 |
| 1.738 | CCND2 | cyclin D2 (CCND2), mRNA.                                                                              | Hs.376071 | NM_001759 |
| 1.395 | SFRP1 | secreted frizzled-related protein 1 (SFRP1), mRNA.                                                    | Hs.708003 | NM_003012 |
| 1.259 | WNT5B | wingless-type MMTV integration site family, member 5B (WNT5B), transcript variant 2, mRNA.            | Hs.306051 | NM_030775 |
| 1.156 | RAC2  | ras-related C3 botulinum toxin substrate 2 (rho family, small GTP binding protein Rac2) (RAC2), mRNA. | Hs.517601 | NM_002872 |

**B.** Cytokines/Cytokines receptors

| Value | Gene      | Description                                                                                                      | UniGene   | RefSeq    |
|-------|-----------|------------------------------------------------------------------------------------------------------------------|-----------|-----------|
| 1.848 | TNFRSF10D | tumor necrosis factor receptor superfamily, member 10d, decoy with truncated death domain (TNFRSF10D), mRNA.     | Hs.213467 | NM_003840 |
| 1.468 | TNFRSF10B | tumor necrosis factor receptor superfamily, member 10b (TNFRSF10B), transcript variant 2, mRNA.                  | Hs.521456 | NM_147187 |
| 1.347 | TNFRSF10C | tumor necrosis factor receptor superfamily, member 10c, decoy without an intracellular domain (TNFRSF10C), mRNA. | Hs.655801 | NM_003841 |
| 1.106 | IL1R2     | interleukin 1 receptor, type II (IL1R2), transcript variant 2, mRNA.                                             | Hs.25333  | NM_173343 |
| 1.082 | IL18      | interleukin 18 (interferon-gamma-inducing factor) (IL18), mRNA.                                                  | Hs.83077  | NM_001562 |
| 1.073 | VEGFC     | vascular endothelial growth factor C (VEGFC), mRNA.                                                              | Hs.435215 | NM_005429 |

**C.** p53 pathway

| Value | Gene      | Description                                                                                     | UniGene   | RefSeq       |
|-------|-----------|-------------------------------------------------------------------------------------------------|-----------|--------------|
| 1.738 | CCND2     | cyclin D2 (CCND2), mRNA.                                                                        | Hs.376071 | NM_001759    |
| 1.737 | CDKN1A    | cyclin-dependent kinase inhibitor 1A (p21, Cip1) (CDKN1A), transcript variant 1, mRNA.          | Hs.370771 | NM_000389    |
| 1.468 | TNFRSF10B | tumor necrosis factor receptor superfamily, member 10b (TNFRSF10B), transcript variant 2, mRNA. | Hs.521456 | NM_147187    |
| 1.393 | PERP      | PERP, TP53 apoptosis effector (PERP), mRNA.                                                     | Hs.520421 | NM_022121    |
| 1.017 | STEAP3    | STEAP family member 3 (STEAP3), transcript variant 3, mRNA.                                     | Hs.647822 | NM_001008410 |
| 1.012 | ZMAT3     | zinc finger, matrin type 3 (ZMAT3), transcript variant 2, mRNA.                                 | Hs.386299 | NM_152240    |
