# Supplementary material
Source: PubMed Central journal article supplement (PMC7439003)

Figure S4

A

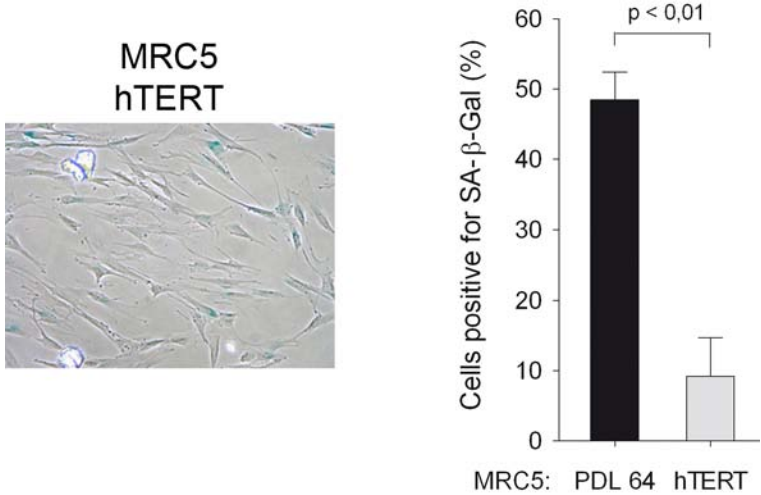

B

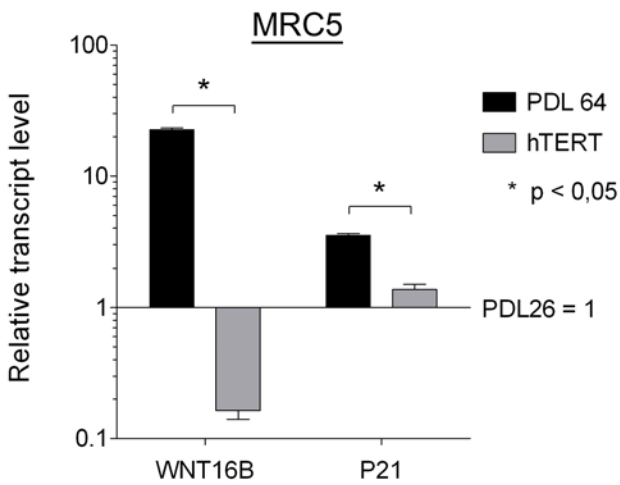

C

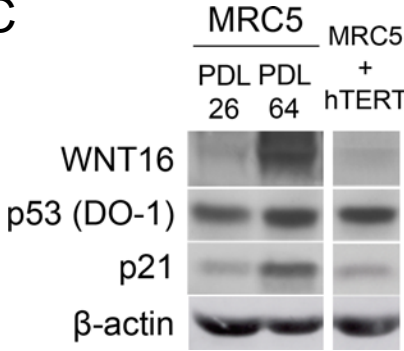

Supplement: NIHMS1601041-supplement-Supplemental_figure_4.pdf [file NIHMS1601041-supplement-Supplemental_figure_4.pdf]

Figure S5

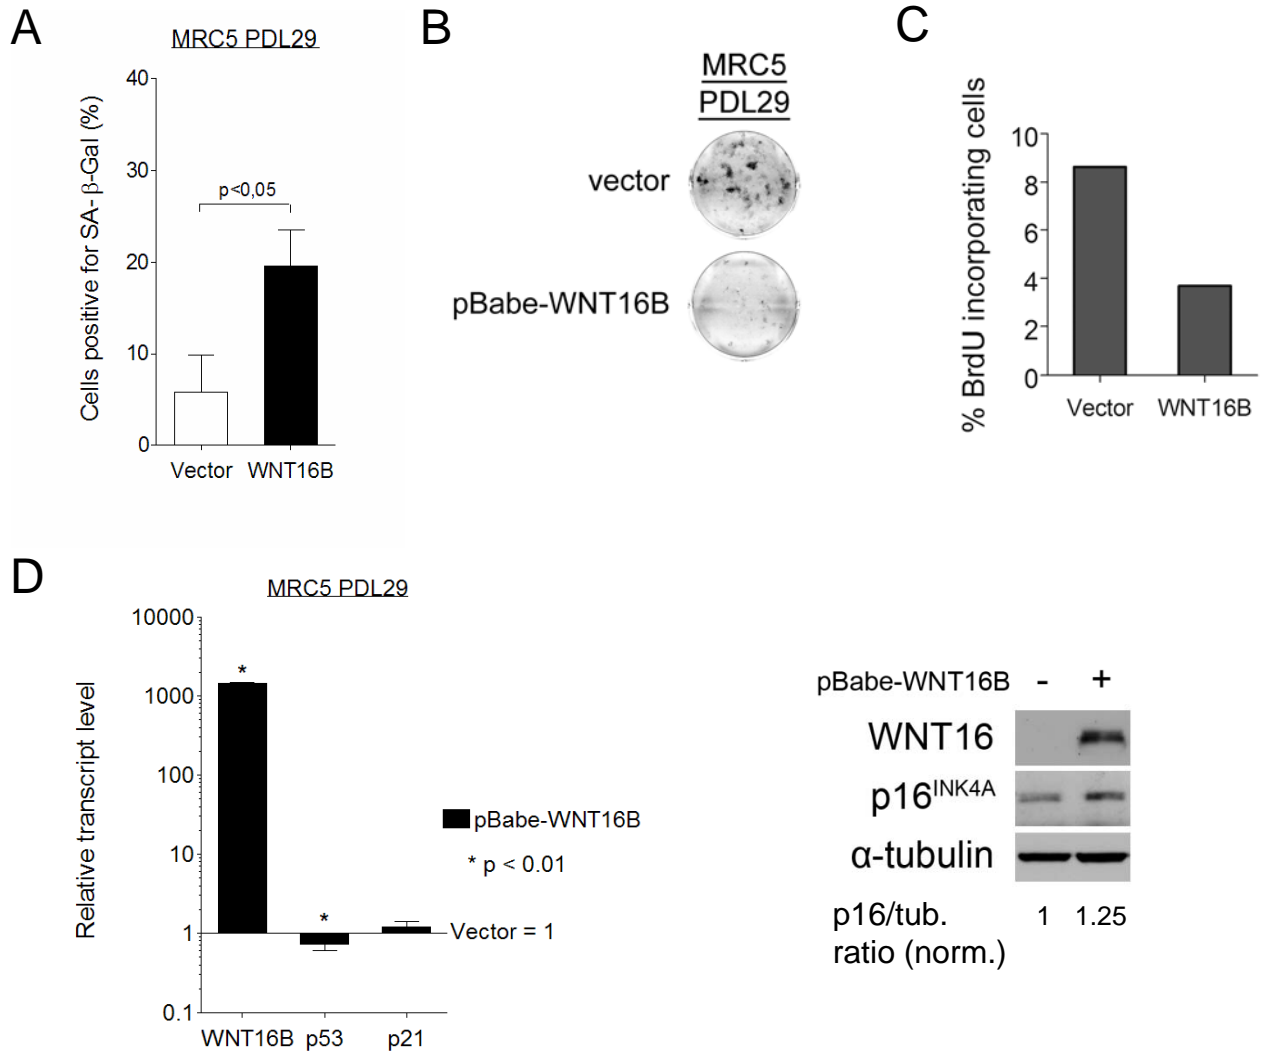

Supplement: NIHMS1601041-supplement-Supplemental_figure_5.pdf [file NIHMS1601041-supplement-Supplemental_figure_5.pdf]
